1 Legumes as a substitute for red and processed meat, poultry,  
2 or fish, and the risk of non-alcoholic fatty liver disease in a large  
3 cohort

4 Fie Langmann<sup>1</sup>, Daniel B. Ibsen<sup>1,2</sup>, Luke W. Johnston<sup>2</sup>, Aurora Perez-Cornago<sup>3</sup>, Christina C.  
5 Dahm<sup>1</sup>

6 1. Aarhus University, Department of Public Health, Bartholins Allé 2, 8000 Aarhus C,  
7 Denmark.

8 2. Steno Diabetes Center Aarhus, Aarhus University Hospital, Palle Juul-Jensens Boulevard  
9 11, 8200 Aarhus C, Denmark

10 3. European Commission, Joint Research Centre (JRC), Ispra, Italy.

11

12 Author contributions: FL, DBI, APC, and CCD conceived the research question and designed  
13 the analysis plan. FL, DBI, and LWJ conducted the data analysis. FL, DBI, and CCD drafted  
14 the manuscript. All authors interpreted the results and critically revised the article for  
15 important intellectual content and gave final approval of the version to publish.

16 Corresponding author:

17 Christina C. Dahm. Department of Public Health, Aarhus University, Bartholins Allé 2,  
18 Aarhus-8000, Denmark. E-mail: [ccd@ph.au.dk](mailto:ccd@ph.au.dk), phone: +45 2332 1875

## 19 Abstract

20 **Background:** Dietary recommendations have globally shifted towards promoting  
21 consumption of legumes as an environmentally friendly and healthy source of protein. This  
22 study investigated replacement of red and processed meat, poultry, or fish for equal amounts  
23 of legumes on the risk of non-alcoholic fatty liver disease (NAFLD).

24 **Methods:** UK Biobank participants who completed  $\geq 2$  dietary assessments and had complete  
25 covariate information were included in the analyses (N=124,194). Information on dietary  
26 intake was collected using two to five 24-hour dietary assessments. Incident cases of NAFLD  
27 were determined through linkage to the National Health Service registries. The rate of  
28 developing NAFLD when replacing 80 g/week of red and processed meat, poultry, or fish  
29 with legumes was estimated using multivariable-adjusted Cox proportional hazards  
30 regression.

31 **Results:** During follow-up (median 10.49, IQR: 10.4-10.9 years), 1201 individuals developed  
32 NAFLD. Replacing 80 g/week red and processed meat or poultry with legumes was  
33 associated with 4% and 3% lower rates of NAFLD, respectively (meat HR: 0.96, 95% CI:  
34 0.94; 0.98; poultry HR: 0.97, 95% CI: 0.95; 0.99). Replacing 80 g/week of fish with legumes  
35 was not associated with NAFLD (fish HR: 0.98, 95% CI: 0.96; 1.01). Results did not change  
36 markedly after adjustment for BMI.

37 **Conclusions:** Consuming one serving of legumes weekly instead of red and processed meat  
38 or poultry was associated with a slightly lower rate of NAFLD, while consuming legumes  
39 instead of fish did not show an association with NAFLD. Further research in cohorts with  
40 higher legume consumption is needed to confirm these findings.

41 **Highlights**

42 Food substitution models improve interpretation of studies of dietary exposures in  
43 observational studies.

44

45 Replacing red and processed meat or poultry with legumes was associated with slightly lower  
46 rates of non-alcoholic fatty liver disease in the UK Biobank. No association was found when  
47 replacing fish with legumes.

48

49 Keywords: dietary pulses, legumes, non-alcoholic fatty liver disease, NAFLD, nutritional  
50 epidemiology, dietary substitution model

## 51 **Introduction**

52 Non-alcoholic fatty liver disease (NAFLD), defined as liver fat content of more than 5%  
53 without secondary causes of hepatic fat accumulation, is the most prevalent chronic liver  
54 disease with a global prevalence of 25%.<sup>(1)</sup> NAFLD is associated with an increased risk of  
55 cardiovascular diseases<sup>(1)</sup> and can furthermore progress to non-alcoholic steatohepatitis  
56 (NASH), which may further predispose individuals to develop fatal liver complications.<sup>(2; 3)</sup>  
57 Long-term exposure to Western diets, obesity, physical inactivity, and smoking are all risk  
58 factors for NAFLD.<sup>(4)</sup> Concurrently, NAFLD and NASH increase the levels of liver enzymes  
59 like alanine aminotransferase (ALT), which have been associated with increased incidence of  
60 all-cause and cancer mortality.<sup>(5; 6)</sup>

61 Food production and consumption contribute up to 42% of global CO<sub>2</sub> emissions.<sup>(7; 8)</sup> To  
62 reduce climate impacts of human diets, sustainable dietary guidelines have been introduced  
63 emphasising greater consumption of plant-based protein sources such as legumes.<sup>(9; 10)</sup> The  
64 climate impact of legumes is undoubtedly low,<sup>(7)</sup> however the scientific evidence on the  
65 association between legume intake in isolation and health outcomes is sparse.<sup>(11)</sup> Legumes are  
66 good sources of protein, low in saturated fat and energy density, and rich in dietary fibre; all  
67 components associated with a healthy diet.<sup>(12)</sup> Consumption of diets including legumes has  
68 been associated with overall better diet quality and greater health compared to consuming  
69 Western diets high in red and processed meat, fats, and sugars in observational studies.<sup>(13-15)</sup>  
70 Animal studies have shown that legume consumption up-regulates lipid metabolism in liver  
71 cells, thus minimizing the risk of NAFLD by reducing the build-up of fats in the liver.<sup>(16; 17)</sup>  
72 However, research in humans on the association between legume consumption and NAFLD  
73 is sparse and inconclusive.<sup>(11; 18; 19)</sup>

74 When individuals limit their intake of certain food groups, they will increase the intake of  
75 certain other food groups, in an otherwise stable diet.<sup>(20)</sup> Legumes are often included in the  
76 diet as a source of plant-based protein, and the health benefits of substituting legumes for  
77 other protein-rich foods may depend on the substitute as some sources of protein may be  
78 better to replace than others.<sup>(19)</sup> Replacing protein from animal sources with protein from  
79 plant sources has previously been associated with a substantially lower mortality rate in some  
80 studies.<sup>(21)</sup> Furthermore, even low consumption of red and processed meats has been  
81 associated with a greater risk of developing NAFLD, while consumption of seafood or  
82 poultry has shown mixed directions of associations.<sup>(1-3)</sup> Therefore, this study aimed to  
83 investigate the association between replacing red and processed meat, poultry, or fish with

84 legumes and the risk of NAFLD or NASH contingent on potential confounders of the  
85 associations.

86

## 87 **Methods**

### 88 **Study population and setting**

89 The UK Biobank prospective cohort was established in 2006 and invited 9.2 million people  
90 to participate in the study.<sup>(22)</sup> The participation rate of 5.5% resulted in approximately  
91 500,000 participants aged 37-73 years in the study. At baseline, participants provided detailed  
92 information on sociodemographic, physical, lifestyle, diet, and health-related characteristics  
93 via self-completed touch-screen questionnaires and a computer-assisted personal  
94 interview.<sup>(22)</sup> Professionally trained staff took physical, anthropometric, and biomedical  
95 measures following standardized procedures.<sup>(22)</sup> Participants' diets were assessed with up to  
96 five 24-hour dietary assessments, using the Oxford WebQ,<sup>(23)</sup> which was completed at least  
97 once by 210,950 individuals.

98 For the current study, only participants who completed two or more 24-hour dietary  
99 assessments were included in the analysis to capture usual intake of legumes. Participants  
100 with missing information on covariates were excluded apart from missing information on  
101 physical activity. If participants were missing information in all these categories, they were  
102 excluded from the study; if any information was available, the participant was included and  
103 individual missing data points on physical activity were coded as unknown.

104 All participants gave written informed consent to participate in the study. The UK  
105 Biobank was approved by the National Information Governance Board for Health and Social  
106 Care and the National Health Service (NHS) North West Multicentre Research Ethics  
107 Committee (ref 21/NW/0157). This research has been conducted using the UK Biobank  
108 Resource under Application Number 81520.

109

### 110 **Assessment of diet**

111 Individuals recruited in the final recruitment period, between April 2009 and September  
112 2010, completed their first Oxford WebQ at the assessment centre at baseline (N = 70,747).  
113 Any participant in the UK Biobank cohort who provided a valid email address was invited to  
114 complete the Oxford WebQ online on four separate occasions during follow-up.<sup>(23)</sup>

115 The Oxford WebQ was designed as an internet-based 24-hour dietary assessment tool. The  
116 questionnaire comprises a short set of food frequency questions on commonly eaten food

117 groups in the British population assessing diet in the previous 24 hours.<sup>(23)</sup> The Oxford  
118 WebQ was validated against interviewer-administered 24-hour dietary recalls and recovery  
119 biomarkers.<sup>(24)</sup> The validation showed similar performance for estimating true intakes of  
120 protein, potassium, and total sugars when using two or more dietary assessments compared to  
121 the more burdensome interviewer-based recall.<sup>(24)</sup> Recently, the Oxford WebQ nutrient  
122 calculation was updated to provide more detailed information on nutrient intakes and to  
123 incorporate new dietary variables.<sup>(25)</sup>

124 Consumption of legumes, red and processed meats, poultry, and fish was based on the  
125 total weight of food group intakes estimated as the average from participants' responses in  
126 the Oxford WebQs.<sup>(26)</sup> The food groups used in this study are defined in Supplementary  
127 Table 1.

128

### 129 **Non-alcoholic fatty liver**

130 The International Classification of Diseases and Related Health Problems 10<sup>th</sup> edition disease  
131 codes (ICD-10) were used to define disease outcomes.<sup>(27)</sup> The entity metabolic dysfunction-  
132 associated steatotic liver disease (MASLD) was defined in 2023 as the new nomenclature for  
133 NAFLD and NASH. However, as MASLD is not part of the ICD-10<sup>th</sup> edition upon which the  
134 outcomes are defined and diagnosed, we used NAFLD and NASH throughout this  
135 manuscript.<sup>(28)</sup> Incident cases of NASH and NAFLD were assessed through linkage to the  
136 NHS registers, where diagnosis after hospital admissions were coded according to the ICD-  
137 10.<sup>(27)</sup> Incident cases of NAFLD were diagnosed with ICD-10-code K76.0 at first admission  
138 to the hospital while incident cases of NASH were diagnosed with ICD-10-code K75.8.<sup>(29)</sup>

139

### 140 **Covariates**

141 Covariates were chosen *a priori* based on a review of the literature and directed acyclic  
142 graphs (Supplementary Figure 1).

143 Information on covariates included information on average intakes of all other food groups  
144 retrieved from the Oxford WebQ (refined cereal, whole grain cereal, dairy products, dietary  
145 fats, fruits, vegetables, nuts, mixed dishes, potatoes and tubers, eggs, non-alcoholic  
146 beverages, alcoholic beverages, snacks, and sauces and condiments). Other covariates were  
147 self-reported at the baseline visit and included information on sex, age, ethnicity, yearly  
148 income, educational level, Townsend Deprivation Index (0 indicates that an individual lives  
149 in an area with overall mean deprivation, positive values indicate higher material deprivation  
150 while negative values indicate relative affluence),<sup>(30)</sup> geographical region of recruitment,<sup>(23)</sup>

151 cohabitation, anthropometry, physical activity, smoking status, history of NAFLD-related  
152 diseases, and family history of NAFLD-related diseases. Usual alcohol consumption (g  
153 ethanol/day) was estimated as the average of the responses to the Oxford WebQs. Blood  
154 samples were drawn at baseline for all participants to measure ALT. When elevated, ALT  
155 serves as a proxy measure for increased risk of developing NAFLD.<sup>(5; 6)</sup>

156

## 157 **Statistical analyses**

158 Standard summary statistics were performed to describe the distribution of participants'  
159 baseline characteristics and food group consumption across strata of legume consumption.  
160 The legume consumption strata were defined as non-consumers (0 g/week), low intake  
161 (tertile 1 of those who consumed any legumes), medium intake (tertile 2 of those who  
162 consumed any legumes), and high intake (tertile 3 of those who consumed any legumes).  
163 Summary statistics were also computed to describe baseline characteristics and food group  
164 consumption across incident NAFLD.

165 Multivariable adjusted Cox proportional hazards regression models were used to estimate  
166 the hazard ratio for NAFLD or NASH based on substituting equal masses of red and  
167 processed meat, poultry, or fish with legumes. The NHS defines one serving of legumes and  
168 pulses as three heaped tablespoons or 80 g<sup>(31)</sup> and the substitution magnitude was chosen to  
169 reflect a weekly substitution where one serving of legumes or pulses (80 g) replaced an equal  
170 amount of either red and processed meat, poultry, or fish. Substitutions were modelled using  
171 the leave-one-out approach, following this model:

$$\log(h(t; x)) = \log(h(0; t)) + \beta_1 \text{Legumes}(80g/week) + \beta_2 \text{Total food intake (g/week)} \\ + \beta_3' \text{Other food groups (g/week)} + \beta_4' \text{Covariates}$$

172 Apostrophes indicate a group of coefficients consisting of several individual variables ( $\beta_3'$   
173 and  $\beta_4'$ ). Variables for intakes of each food group ( $\beta_3'$ ) and total food intake ( $\beta_2$ ) were  
174 included and held stable, while the food group that were to be substituted was left out of the  
175 model.<sup>(20)</sup> For instance, when estimating the HR for replacing red and processed meat with  
176 legumes, 80g of legumes was specified in the model, while the intake of red and processed  
177 meat was left out of  $\beta_3'$ . Red and processed meat still contributed to the total food intake  
178 ( $\beta_2$ ). The estimated HR thus expressed the association of keeping the total food intake stable  
179 while specifying that 80 g/week food should come from legumes instead of red and processed  
180 meat.

181 Age was used as the underlying time scale in the analyses. Person-years at risk were  
182 calculated from the date of last completed Oxford WebQ to the date of death, loss to follow-

183 up, diagnosis of NAFLD or NASH, or right censoring, whichever occurred first. As  
184 participants in UK Biobank are still followed today, participants were right censored on  
185 October 31<sup>st</sup>, 2022, when the most recent registry update of full follow-up for the outcomes  
186 was completed. The proportional hazards assumption was evaluated using time-varying  
187 covariates and Schoenfeld residuals and revealed no evidence of deviation.

188 The substitution analyses were conducted with different adjustment levels. Model 1 was  
189 stratified by age at recruitment (<45, 45–49, 50–54, 55–59, 60–64, ≥65 years), geographical  
190 region of recruitment (ten UK regions),<sup>(23)</sup> and sex, and adjusted for intakes of all other food  
191 groups (g/week) apart from the food being replaced. When substituting g/week of legumes  
192 for other foods, the standard unit for all dietary elements was also in g/week. This study  
193 modelled substitution of foods with varying energy densities.<sup>(32; 33)</sup> Nevertheless, to  
194 avoid estimating obscure relative effect estimands with unclear interpretations due to  
195 different units of measurement in the model, total energy intake was not adjusted for.<sup>(33)</sup> The  
196 analyses accounted for all food items based on their weight, and the analyses were adjusted  
197 for total amount of food consumed in g/week.<sup>(20)</sup> Model 2 was further adjusted for alcohol  
198 consumption (continuous; g ethanol/week as restricted cubic splines with 4 knots), ethnicity  
199 (categorical; White, other), educational level (categorical; low: Certificate of Secondary  
200 Education (CSE), National Vocational Qualifications, Higher National Diploma, Higher  
201 National Certificates, other professional qualifications, or equivalent; intermediate: A levels,  
202 O levels, General Certificate of Secondary Education, or equivalent; high: College or  
203 University degree), yearly income (categorical; <18,000£, 18,000-30,999£, 31,000-51,999£,  
204 52,000-100,000£, >100,000£, prefer not to answer), Townsend Deprivation Index  
205 (continuous), cohabitation (categorical; alone, with spouse or partner, with non-partner,  
206 prefer not to answer), physical activity (categorical; low [0-9.9 METs/week], moderate [10-  
207 49.9 METs/week], and high [≥50 METs/week], unknown), smoking status (never, former,  
208 current 1-15 cigarettes per day, current ≥15 cigarettes per day, unknown), history of NAFLD-  
209 related diseases (categorical; yes, no or don't know), and family history of NAFLD-related  
210 diseases (categorical; yes, no or don't know). As obesity may either confound or mediate the  
211 association between replacing red and processed meat, poultry, or fish with legumes and the  
212 risk of NAFLD, model 3 was further adjusted for BMI (categorical; <30 kg/m<sup>2</sup> or ≥30  
213 kg/m<sup>2</sup>).

214

215 **Secondary and sensitivity analyses**



216 Secondary analyses included Cox proportional hazards regression analyses modelled as the  
217 main analyses in model 2, but in a study sample restricted to consumers of legumes (i.e.  
218 removing non legume consumers). We also modelled legume consumption as a continuous  
219 exposure to evaluate the non-substitution association between legume consumption and  
220 NAFLD with an 80 g/week increase in legume consumption without changing other elements  
221 of the diet. This analysis was also conducted among consumers of legumes only and followed  
222 the adjustment levels of model 2 but without excluding any single food components from  $\beta_3$   
223 and without adjusting for total intake of all foods  $\beta_2$ .

224 To evaluate the robustness of the main analyses, multiple sensitivity analyses were  
225 conducted: i) Inclusion of fresh peas in the estimated weekly legume consumption, as fresh  
226 peas are a legume pod though traditionally counted as a vegetable in NHS' 5 A Day  
227 recommendations for fruit and vegetables.<sup>(31)</sup> The amount of peas consumed was estimated  
228 based on the number of reported portions consumed with one portion of peas weighing 80  
229 g/day.<sup>(31)</sup> ii) Exclusion of soy milk from the estimated weekly legume consumption, as soy  
230 milk is unlikely to culinarily replace red and processed meat, poultry, or fish. iii) Excluding  
231 participants above the 90<sup>th</sup> percentile of alcohol intake to reduce the likelihood that cases of  
232 fatty liver disease were caused by alcohol intake. iv) Excluding participants with elevated  
233 ALT levels cut-off at 40 U/L as defined by guidelines from the European Association for the  
234 Study of the Liver<sup>(34; 35)</sup>. v) Excluding participants with < 3 completed Oxford WebQs.

235 All secondary and sensitivity analyses followed the adjustment level in model 2 from the  
236 main analysis (i.e. all covariates were included except BMI).

237 All analyses were conducted in R (Version 4.1.1, The R Foundation for Statistical  
238 Computing) with a two-sided significance level of 5%. The statistical analyses followed a  
239 published protocol.<sup>(36)</sup> The statistical procedures only had minor deviations from the protocol.  
240 Of note, the non-specific substitution was omitted and replaced by the non-substitution  
241 analyses among consumers of legumes. An additional sensitivity analysis excluding soymilk  
242 from the legume component was conducted, as replacing animal-based solid foods for a  
243 beverage may not be feasible. The statistical analyses were structured to be reproducible  
244 using the targets R package<sup>(37)</sup> and all code is available online at [https://github.com/steno-](https://github.com/steno-aarhus/leha/)  
245 [aarhus/leha/](https://github.com/steno-aarhus/leha/) (Accessed on October 21, 2024).

246

## 247 **Results**

248 Of the 502,369 participants in the UK Biobank cohort, 126,812 individuals had completed  
249 two or more Oxford WebQs. Of these, 2381 were excluded due to missing information on  
250 covariates, 192 had an incident event before the start of follow-up, and 45 were lost to  
251 follow-up before baseline. This resulted in a study sample of 124,194 participants (54,921  
252 men, 69,273 women) in the analyses (Figure 1). Participants contributed a total of 1,288,233  
253 person-years of follow-up and 1201 individuals developed NAFLD after a median of 10.49  
254 person-years (interquartile range: 10.42-10.92 years).

255 A large proportion of participants did not report any legume consumption (N = 73,711).  
256 The median (10-90<sup>th</sup> percentile) age at inclusion was 57.0 (44.0-66.0) years and 56% of  
257 participants were women. Individuals with higher legume consumption more often had  
258 another ethnicity than White and consumed less alcohol compared to the full cohort. The  
259 average weekly intakes of the different food groups were unevenly distributed among those  
260 who consumed legumes (across all tertiles) compared to non-consumers. Particularly the  
261 consumption of animal-based foods like red and processed meat, poultry, and fish was lower  
262 among those with the highest intake of legumes, compared to the full cohort and to those with  
263 lower legume consumption (Table 1).

264 When assessing baseline characteristics and food group intakes in relation to the incidence  
265 of NAFLD, those who developed NAFLD had a lower deprivation compared to the full  
266 cohort. Individuals who developed NAFLD more often smoked and had higher BMI  
267 compared to the full cohort. The median daily alcohol intake was, however, lower among  
268 those who developed NAFLD. History of NAFLD-related diseases (individual and family-  
269 related) was more pronounced among individuals who developed NAFLD during follow-up  
270 (Supplementary Table 2).

271 Replacing 80 g/week of red and processed meat with legumes was associated with a lower  
272 rate of developing NAFLD (HR for model 2: 0.96, 95% CI: 0.94; 0.98; Table 2). Adjusting  
273 for BMI (Model 3) changed the magnitude of association slightly (HR: 0.97, 95% CI: 0.95;  
274 0.99). Substituting poultry for legumes was associated with a lower rate of NAFLD (HR for  
275 model 2: 0.97, 95% CI: 0.95; 0.99; Table 2). However, this association was not statistically  
276 significant after adjusting for BMI. Substituting fish for legumes was not associated with  
277 rates of NAFLD (Table 2).

278

### 279 *Secondary and sensitivity analyses*

280 When excluding non-consumers of legumes and reducing the sample size to 50,483  
281 participants (n events = 465), the magnitude of associations changed minimally compared to

282 the main analyses, in which all participants were included (Table 2; red meat HR: 0.97, 95%  
283 CI: 0.94; 0.99; poultry HR: 0.98, 95% CI: 0.95; 1.02; fish HR: 0.99, 95% CI: 0.95; 1.02).  
284 Consuming 80 g/week more legumes without substituting any other foods was not associated  
285 with the rate of NAFLD among consumers (HR: 0.99, 95% CI: 0.98; 1.01).

286 When including peas in the estimated legume consumption, the magnitude and direction of  
287 associations remained similar as in the main analyses, albeit with wider CIs (Table 3; meat  
288 HR: 0.95, 95% CI: 0.92; 0.99; poultry HR: 0.97, 95% CI: 0.93; 1.01; fish HR: 0.98, 95% CI:  
289 0.94; 1.02). Excluding soy milk from the estimated legume consumption also resulted in  
290 similar rates of NAFLD as in the main analyses (meat HR: 0.96, 95% CI: 0.93; 0.98; poultry  
291 HR: 0.97, 95% CI: 0.95; 1.00; fish HR: 0.98, 95% CI: 0.96; 1.01).

292 When removing participants with very high alcohol intake or very high ALT circulating  
293 concentrations the magnitude and direction of associations remained almost identical to those  
294 estimated in main analyses. Exclusion of participants with fewer than three returned Oxford  
295 WebQs resulted in marginally widened CIs (Table 3).

296

## 297 **Discussion**

298 In this prospective study of British individuals, we found that replacing 80 g/week of red and  
299 processed meat or poultry with legumes was associated with a modestly lower NAFLD rate.

300 There is still uncertainty about the optimal type of dietary intervention for the prevention  
301 of NAFLD, and studies have investigated foods as well as sources of protein. Prospective and  
302 cross-sectional studies in humans have indicated that high consumption of animal-based  
303 protein particularly from red and processed meat may increase risk of NAFLD, while plant-  
304 based proteins appear beneficial.<sup>(3; 38-40)</sup> To our knowledge, very few substitution studies,  
305 replacing animal-based foods for legumes, have investigated the risk of NAFLD. One  
306 previous study using two Chinese cohorts investigated replacement of 25 g/day of animal-  
307 sourced foods with legumes in relation to NAFLD-rate. They found that replacing poultry  
308 with legumes was associated with a lower HR for NAFLD in the Guangzhou Nutrition and  
309 Health Study (HR: 0.35, 95%CI: 0.18; 0.69), while replacing red and processed meat or fish  
310 with legumes resulted in higher but non-significant rates of NAFLD (meat HR: 1.16, 95% CI:  
311 0.99; 1.37; fish HR: 1.09, 95% CI: 0.92; 1.30). In the Tianjin Chronic Low-grade Systemic  
312 Inflammation and Health cohort, replacing processed meat and poultry with legumes was  
313 associated with a lower rate of NAFLD, while unprocessed red meat and fish was not  
314 associated with NAFLD.<sup>(19)</sup> An Iranian cross-sectional study did not find any association

315 between substituting protein sources (animal-based or plant-based) and NAFLD.<sup>(41)</sup> One  
316 study using the UKB substituted 15 g/day of red and processed meat for legumes and found  
317 no association with liver cancer, despite this cancer being highly associated with NAFLD.  
318 However, these findings could be due to few cases of liver cancer.<sup>(42)</sup>

319 The substitution effect is a result of including one food and concurrently excluding another  
320 food, and it is therefore not possible to assess whether any beneficial association is caused by  
321 the higher intake of one food group, or the lower intake of the other food group. By replacing  
322 animal-based protein foods like red and processed meat with legumes, intakes of dietary  
323 fiber, unsaturated fats, minerals, antioxidants, and phytochemicals are increased. These  
324 components may have favorable health impacts and could be key factors contributing to  
325 metabolic health, potentially lowering the risk of NAFLD.<sup>(43-46)</sup> In the case of red and  
326 processed meat, this substitution may furthermore lower the intakes of saturated fats,  
327 cholesterol, heme iron, and daily acid loads. These components may trigger oxidative  
328 reactions and pro-inflammatory cytokines, which up-regulate inflammatory responses and  
329 potentially increase the risk of developing NAFLD.<sup>(38; 47; 48)</sup>

330 A substitution size of one weekly serving has previously been argued as a realistic  
331 substitution for the general population.<sup>(19)</sup> Such substitutions may also be feasible for dietary  
332 recommendations for general populations due to the simple consumer message.<sup>(20)</sup> For a  
333 disease like NAFLD with no current medical treatment, it is relevant to identify the optimal  
334 diet for preventing disease onset or worsening, and substitution analyses can provide  
335 invaluable information by specifying comparisons between individual foods.<sup>(49)</sup> Our results  
336 indicate a modest 3-4% lower incidence rate of NAFLD when replacing a serving of red and  
337 processed meat or poultry with legumes, but this was not the case for fish.

338 Compared to research on other foods, very few studies with Western populations have  
339 investigated legume intake specifically. This may be due to a negligible legume consumption  
340 among many cohorts.<sup>(7; 50-54)</sup> Other prospective studies, such as the French Etude NutriNet-  
341 Santé and the multinational Prospective Urban Rural Epidemiology (PURE) study, also have  
342 large proportions of non-consumers of legumes or very low intakes.<sup>(14; 55)</sup> Large variability in  
343 legume consumption exists globally and according to the Global Dietary Database, European  
344 countries represent the lowest consumption worldwide as the population in more than one  
345 third of all countries consume less than 10 g/day.<sup>(7)</sup> It may also be that weak or null  
346 associations in combination with low intakes and high proportions of non-consumers, have  
347 led to less focus to publish studies in this research area.<sup>(51-54; 56)</sup> To address the high  
348 proportion of non-consumers in our study population, we excluded non-consumers in

349 sensitivity analyses. The results did not change markedly, but this exclusion limits the  
350 generalizability of these results to the general population.

351 Our substitution models did not adjust for energy intake leading to a caloric difference in  
352 the substitution, which would be related to weight and NAFLD (Supplementary Figure 1).  
353 Although BMI is clinically on the causal path between food intake and NAFLD, we observed  
354 only minor differences in results of our food substitution models with and without adjustment  
355 for baseline BMI. We were thus unable to confirm any mediation of the association between  
356 replacing red and processed meats, poultry, or fish with legumes through BMI. Similarly, the  
357 study on the two Chinese cohorts found mixed associations despite adjusting for BMI.<sup>(19)</sup>  
358 Formal causal mediation studies of the role of BMI after baseline on these associations in  
359 other studies may provide clearer answers.

360 This study has several strengths including the prospective cohort design, large sample size  
361 and detailed assessment of lifestyle. Furthermore, the food-level substitution analysis is one  
362 of the first to investigate the impacts of replacing red and processed meat, poultry, and fish  
363 with legumes on the rate of NAFLD. The study does however also have some limitations.  
364 Participants in health research often differentiate from the underlying population on certain  
365 characteristics such as health behaviour and literacy. This may introduce selection on the  
366 exposure level, where individuals with a higher consumption of healthy foods, such as  
367 legumes, are more prone to participate. Our study may therefore not provide accurate  
368 estimates of the prevalence of legume intake in the UK due to healthy volunteer bias.  
369 Despite being developed and validated against recovery biomarkers, short-term dietary  
370 assessments methods such as the Oxford WebQ have some shortcomings with assessing  
371 habitual dietary intake compared to a food frequency questionnaire (FFQ), particularly  
372 capturing usual intake of foods that are not consumed very frequently. If diet is only assessed  
373 at one time point, the FFQ captures habitual diet better.<sup>(57; 58)</sup> Including only participants who  
374 had completed at least two WebQs ensured more accurate estimation of usual intake  
375 compared to relying on a single measurement.<sup>(59; 60)</sup> This approach also allowed us to  
376 adequately capture the range of exposure necessary to examine the association between  
377 legume intake and NAFLD. Most participants completed two diet assessments, but usual  
378 intake of foods not consumed daily in this population, such as legumes and fish, may not  
379 have been fully captured. However, the sensitivity analyses using three dietary assessments  
380 did not show a change in magnitude or direction of associations. All participants completed a  
381 touchscreen dietary questionnaire at recruitment, which may capture the usual intake of meat  
382 and fish intakes better than the 24-hour dietary assessments. However, as legume

383 consumption was not reported separately from vegetables in the touchscreen questionnaire,  
384 we were unable to use these data. Furthermore, the prospective study design ensures that  
385 participation is non-differential with regards to the outcome, and thus selection bias is  
386 unlikely to have affected our results. Despite the thorough adjustment for confounding,  
387 residual confounding cannot be ruled out in observational studies. The substitution analyses  
388 were furthermore purely observational limiting any causal inference from the results. Future  
389 randomized controlled trials would be needed to confirm the findings of our study in a causal  
390 setting.

391

### 392 **Conclusion**

393 Replacing red and processed meat or poultry with legumes was associated with a slightly  
394 lower rate of NAFLD in this population from the UK. No association was observed when  
395 substituting fish for legumes. While the associations identified in this study were modest, our  
396 findings align with general recommendations promoting increased consumption of legumes.  
397 Further research in populations with higher legume intake is warranted to confirm these  
398 findings.

399 **Acknowledgments:** The authors acknowledge the participants who provided data and the  
400 members of the UK Biobank cohort who collected the data.

401 **Transparency Declaration:** The lead author affirms that this manuscript is an honest,  
402 accurate, and transparent account of the study being reported. The reporting of this work is  
403 compliant with the Strengthening the Reporting of Observational Studies in Epidemiology  
404 guidelines for nutritional epidemiology (STROBE-nut). The lead author affirms that no  
405 important aspects of the study have been omitted and that any discrepancies from the study as  
406 planned (<https://doi.org/10.5281/zenodo.11670547>) have been explained.

407 **Conflicts of interest:** None of the authors have any conflicts of interest to declare.

408 **Funding:** This study was funded by Aarhus University and the Steno Diabetes Center  
409 Aarhus. The Graduate School of Health, Aarhus University funded the salary of Fie  
410 Langmann. Access to data and data management was funded by the Steno Diabetes Center  
411 Aarhus. Daniel B. Ibsen was funded by the Independent Research Fund Denmark with grant  
412 number 1057-00016B and the Danish Diabetes Association. The funding agencies had no  
413 role in the design and conduct of the study; the collection, management, analysis, and

414 interpretation of the data; the preparation, review, and approval of the manuscript, or the  
415 decision to publish the manuscript.

416 **Data availability:** The study was based on data from the UK Biobank prospective cohort that  
417 are not publicly available due to personal information. Access to data can be acquired  
418 through an application to the Access Management System of UK Biobank online  
419 (<https://www.ukbiobank.ac.uk/enable-your-research/apply-for-access>).



## 420 References

- 421 1. Wang RZ, Zhang WS, Jiang CQ *et al.* Association of fish and meat consumption with non-alcoholic  
422 fatty liver disease: Guangzhou Biobank Cohort Study. *BMC Public Health*, 2023; **23**: 2433.
- 423 2. Tan LJ, Shin S. Effects of oily fish and its fatty acid intake on non-alcoholic fatty liver disease  
424 development among South Korean adults. *Front Nutr*, 2022; **9**: 876909.
- 425 3. Hashemian M, Merat S, Poustchi H *et al.* Red Meat Consumption and Risk of Nonalcoholic Fatty  
426 Liver Disease in a Population With Low Meat Consumption: The Golestan Cohort Study. *Am J*  
427 *Gastroenterol*, 2021; **116**: 1667-1675.
- 428 4. Al-Dayyat HM, Rayyan YM, Tayyem RF. Non-alcoholic fatty liver disease and associated dietary and  
429 lifestyle risk factors. *Diabetes Metab Syndr*, 2018; **12**: 569-575.
- 430 5. Wattacheril JJ, Abdelmalek MF, Lim JK *et al.* AGA Clinical Practice Update on the Role of  
431 Noninvasive Biomarkers in the Evaluation and Management of Nonalcoholic Fatty Liver Disease:  
432 Expert Review. *Gastroenterology*, 2023; **165**: 1080-1088.
- 433 6. European Association for the Study of the Liver (EASL), European Association for the Study of  
434 Diabetes (EASD), European Association for the Study of Obesity (EASO). EASL-EASD-EASO Clinical  
435 Practice Guidelines for the management of non-alcoholic fatty liver disease. *J Hepatol*, 2016; **64**:  
436 1388-1402.
- 437 7. Yanni AE, Iakovidi S, Vasilikopoulou E *et al.* Legumes: A Vehicle for Transition to Sustainability.  
438 *Nutrients*, 2023; **16**: 98.
- 439 8. Food Research Collaboration (2022) *Putting climate on everyone's table: Summary of what the*  
440 *IPCC WG3 report says about food and diet*. City University of London.
- 441 9. Blomhoff R, Andersen R, Arnesen EK *et al.* (2023) Nordic Nutrition Recommendations 2023.  
442 <https://www.norden.org/en/publication/nordic-nutrition-recommendations-2023>
- 443 10. Willett W, Rockström J, Loken B *et al.* Food in the Anthropocene: the EAT-Lancet Commission on  
444 healthy diets from sustainable food systems. *Lancet*, 2019; **393**: 447-492
- 445 11. Zhao N, Jiao K, Chiu Y-H *et al.* Pulse Consumption and Health Outcomes: A Scoping Review.  
446 *Nutrients*, 2024; **16**: 1435.
- 447 12. Rebello CJ, Greenway FL, Finley JW. A review of the nutritional value of legumes and their effects  
448 on obesity and its related co-morbidities. *Obes Rev*, 2014; **15**: 392-407.
- 449 13. Dinu M, Abbate R, Gensini GF *et al.* Vegetarian, vegan diets and multiple health outcomes: A  
450 systematic review with meta-analysis of observational studies. *Crit Rev Food Sci Nutr* 2017; **57**: 3640-  
451 3649.
- 452 14. Miller V, Mente A, Dehghan M *et al.* Fruit, vegetable, and legume intake, and cardiovascular  
453 disease and deaths in 18 countries (PURE): a prospective cohort study. *Lancet*, 2017; **390**: 2037-  
454 2049.
- 455 15. Mudryj AN, Yu N, Hartman TJ *et al.* Pulse consumption in Canadian adults influences nutrient  
456 intakes. *Br J Nutr*, 2012; **108** S27-36.
- 457 16. Hong J, Kim S, Kim H-S. Hepatoprotective Effects of Soybean Embryo by Enhancing Adiponectin-  
458 Mediated AMP-Activated Protein Kinase  $\alpha$  Pathway in High-Fat and High-Cholesterol Diet-Induced  
459 Nonalcoholic Fatty Liver Disease. *J Med Food*, 2016; **19**: 549-559.
- 460 17. Son Y, Jang MK, Jung MH. Vigna nakashimae extract prevents hepatic steatosis in obese mice fed  
461 high-fat diets. *J Med Food*, 2014; **17**: 1322-1331.
- 462 18. Zhang S, Kumari S, Gu Y *et al.* Soy Food Intake Is Inversely Associated with Newly Diagnosed  
463 Nonalcoholic Fatty Liver Disease in the TCLSIH Cohort Study. *J Nutr*, 2020; **150**: 3280-3287.
- 464 19. Zhang S, Yan Y, Meng G *et al.* Protein foods from animal sources and risk of nonalcoholic fatty  
465 liver disease in representative cohorts from North and South China. *J Intern Med* 2023; **293**: 340-  
466 353.
- 467 20. Ibsen DB, Laursen ASD, Würtz AML *et al.* Food substitution models for nutritional epidemiology.  
468 *Am J Clin Nutr* 2020; **113**: 294-303.
- 469 21. Song M, Fung TT, Hu FB *et al.* Association of Animal and Plant Protein Intake With All-Cause and  
470 Cause-Specific Mortality. *JAMA Intern Med*, 2016; **176**: 1453-1463.



- 471 22. Sudlow C, Gallacher J, Allen N *et al*. UK biobank: an open access resource for identifying the  
472 causes of a wide range of complex diseases of middle and old age. *PLoS Med*, 2015; **12**: e1001779.
- 473 23. Watling CZ, Kelly RK, Dunneram Y *et al*. Associations of intakes of total protein, protein from  
474 dairy sources, and dietary calcium with risks of colorectal, breast, and prostate cancer: a prospective  
475 analysis in UK Biobank. *Br J Cancer*, 2023; **129**: 636-647.
- 476 24. Greenwood DC, Hardie LJ, Frost GS *et al*. Validation of the Oxford WebQ Online 24-Hour Dietary  
477 Questionnaire Using Biomarkers. *Am J Epidemiol*, 2019; **188**: 1858-1867.
- 478 25. Perez-Cornago A, Pollard Z, Young H *et al*. Description of the updated nutrition calculation of the  
479 Oxford WebQ questionnaire and comparison with the previous version among 207,144 participants  
480 in UK Biobank. *Eur J Nutr*, 2021; **60**: 4019-4030.
- 481 26. Piernas C, Perez-Cornago A, Gao M *et al*. Describing a new food group classification system for  
482 UK biobank: analysis of food groups and sources of macro- and micronutrients in 208,200  
483 participants. *Eur J Nutr*, 2021; **60**: 2879-2890.
- 484 27. NHS Digital (2021) NHS Data Model and Dictionary International Classification of Diseases (ICD).  
485 [https://datadictionary.nhs.uk/supporting\\_information/international\\_classification\\_of\\_diseases\\_icd](https://datadictionary.nhs.uk/supporting_information/international_classification_of_diseases_icd.html)  
486 [.html](https://datadictionary.nhs.uk/supporting_information/international_classification_of_diseases_icd.html) (accessed 14 October 2021)
- 487 28. Rinella ME, Lazarus JV, Ratziu V *et al*. A multisociety Delphi consensus statement on new fatty  
488 liver disease nomenclature. *Hepatology*, 2023; **78**: 1966-1986.
- 489 29. UK Biobank (2020) *Hospital inpatient data*. UK Biobank.
- 490 30. National Centre for Research Methods (n.d.) Geographical Referencing Learning Resources -  
491 Townsend Deprivation Index. <https://www.restore.ac.uk/geo-refer/36229dtuks00y19810000.php>  
492 (accessed 23 April 2024)
- 493 31. UK National Health Services (2022) 5 A Day portion sizes. [https://www.nhs.uk/live-well/eat-](https://www.nhs.uk/live-well/eat-well/5-a-day/portion-sizes/)  
494 [well/5-a-day/portion-sizes/](https://www.nhs.uk/live-well/eat-well/5-a-day/portion-sizes/) (accessed 16 December 2022)
- 495 32. Tomova GD, Arnold KF, Gilthorpe MS *et al*. Adjustment for energy intake in nutritional research:  
496 a causal inference perspective. *Am J Clin Nutr*, 2022; **115**: 189-198.
- 497 33. Tomova GD, Gilthorpe MS, Tennant PWG. Theory and performance of substitution models for  
498 estimating relative causal effects in nutritional epidemiology. *The American Journal of Clinical*  
499 *Nutrition*, 2022; **116**: 1379-1388.
- 500 34. Radonjić T, Milićević O, Jovanović I *et al*. Elevated Transaminases as Predictors of COVID-19  
501 Pneumonia Severity. *Medicina (Kaunas)*, 2022; **58**.
- 502 35. Claus M, Antoni C, Hofmann B. Factors associated with elevated alanine aminotransferase in  
503 employees of a German chemical company: results of a large cross-sectional study. *BMC*  
504 *Gastroenterol*, 2021; **21**: 25.
- 505 36. Langmann F, Ibsen DB, Johnston LW *et al*. Protocol: Substituting red and processed meat,  
506 poultry, and fish with legumes and risk of non-alcoholic fatty liver disease in a large prospective  
507 cohort. *Zenodo*, 2024.
- 508 37. Landau W. The targets R package: a dynamic Make-like function-oriented pipeline toolkit for  
509 reproducibility and high-performance computing. *Journal of Open Source Software*, 2021; **6**: 2959.
- 510 38. Alferink LJ, Kieft-de Jong JC, Erler NS *et al*. Association of dietary macronutrient composition  
511 and non-alcoholic fatty liver disease in an ageing population: the Rotterdam Study. *Gut*, 2019; **68**:  
512 1088-1098.
- 513 39. Nouredin M, Zelber-Sagi S, Wilkens LR *et al*. Diet Associations With Nonalcoholic Fatty Liver  
514 Disease in an Ethnically Diverse Population: The Multiethnic Cohort. *Hepatology*, 2020; **71**: 1940-  
515 1952.
- 516 40. Rietman A, Sluik D, Feskens EJM *et al*. Associations between dietary factors and markers of  
517 NAFLD in a general Dutch adult population. *Eur J Clin Nutr*, 2018; **72**: 117-123.
- 518 41. Amirkalali B, Khoonsari M, Sohrabi MR *et al*. Relationship between dietary macronutrient  
519 composition and non-alcoholic fatty liver disease in lean and non-lean populations: a cross-sectional  
520 study. *Public Health Nutr* 2021; **24**: 6178-6190.

- 521 42. Bock N, Langmann F, Johnston LW *et al*. The Association between the Substitution of Red Meat  
522 with Legumes and the Risk of Primary Liver Cancer in the UK Biobank: A Cohort Study. *Nutrients*,  
523 2024; **16**: 2383.
- 524 43. Satija A, Bhupathiraju SN, Spiegelman D *et al*. Healthful and Unhealthful Plant-Based Diets and  
525 the Risk of Coronary Heart Disease in U.S. Adults. *J Am Coll Cardiol*, 2017; **70**: 411-422.
- 526 44. Ferreira H, Vasconcelos M, Gil AM *et al*. Benefits of pulse consumption on metabolism and  
527 health: A systematic review of randomized controlled trials. *Crit Rev Food Sci Nutr*, 2021; **61**: 85-96.
- 528 45. Bouchenak M, Lamri-Senhadji M. Nutritional quality of legumes, and their role in  
529 cardiometabolic risk prevention: a review. *J Med Food*, 2013; **16**: 185-198.
- 530 46. Mudryj AN, Yu N, Aukema HM. Nutritional and health benefits of pulses. *Appl Physiol Nutr*  
531 *Metab*, 2014; **39**: 1197-1204.
- 532 47. Ma J, Hennein R, Liu C *et al*. Improved Diet Quality Associates With Reduction in Liver Fat,  
533 Particularly in Individuals With High Genetic Risk Scores for Nonalcoholic Fatty Liver Disease.  
534 *Gastroenterology*, 2018; **155**: 107-117.
- 535 48. Sivasubramanian BP, Dave M, Panchal V *et al*. Comprehensive Review of Red Meat Consumption  
536 and the Risk of Cancer. *Cureus*, 2023; **15**: e45324.
- 537 49. Song M, Giovannucci E. Substitution analysis in nutritional epidemiology: proceed with caution.  
538 *Eur J Epidemiol*, 2018; **33**: 137-140.
- 539 50. Faber I, Henn K, Brugarolas M *et al*. Relevant characteristics of food products based on  
540 alternative proteins according to European consumers. *J Sci Food Agric*, 2021.
- 541 51. Mertens E, Kuijsten A, Dofková M *et al*. Geographic and socioeconomic diversity of food and  
542 nutrient intakes: a comparison of four European countries. *Eur J Nutr*, 2019; **58**: 1475-1493.
- 543 52. Rawal V, Charrondiere R, Xipsiti M *et al*. (2019) *The Global Economy of Pulses*. Food and  
544 Agriculture Organization of the United Nations.
- 545 53. Figueira N, Curtain F, Beck E *et al*. Consumer Understanding and Culinary Use of Legumes in  
546 Australia. *Nutrients*, 2019; **11**: 1575.
- 547 54. Perera T, Russo C, Takata Y *et al*. Legume Consumption Patterns in US Adults: National Health  
548 and Nutrition Examination Survey (NHANES) 2011–2014 and Beans, Lentils, Peas (BLP) 2017 Survey.  
549 *Nutrients*, 2020; **12**: 1237.
- 550 55. Berthy F, Brunin J, Allès B *et al*. Association between adherence to the EAT-Lancet diet and risk of  
551 cancer and cardiovascular outcomes in the prospective NutriNet-Santé cohort. *The American Journal*  
552 *of Clinical Nutrition*, 2022; **116**: 980-991.
- 553 56. Sharma H, Verma S. Is positive publication bias really a bias, or an intentionally created  
554 discrimination toward negative results? *Saudi J Anaesth*, 2019; **13**: 352-355.
- 555 57. Freedman LS, Midthune D, Arab L *et al*. Combining a Food Frequency Questionnaire With 24-  
556 Hour Recalls to Increase the Precision of Estimation of Usual Dietary Intakes-Evidence From the  
557 Validation Studies Pooling Project. *Am J Epidemiol*, 2018; **187**: 2227-2232.
- 558 58. Park Y, Dodd KW, Kipnis V *et al*. Comparison of self-reported dietary intakes from the Automated  
559 Self-Administered 24-h recall, 4-d food records, and food-frequency questionnaires against recovery  
560 biomarkers. *The American Journal of Clinical Nutrition*, 2018; **107**: 80-93.
- 561 59. Carter JL, Lewington S, Piernas C *et al*. Reproducibility of dietary intakes of macronutrients,  
562 specific food groups, and dietary patterns in 211 050 adults in the UK Biobank study. *J Nutr Sci*, 2019;  
563 **8**: e34.
- 564 60. Galante J, Adamska L, Young A *et al*. The acceptability of repeat Internet-based hybrid diet  
565 assessment of previous 24-h dietary intake: administration of the Oxford WebQ in UK Biobank.  
566 *British Journal of Nutrition*, 2016; **115**: 681-686.

567

Table 1. Baseline characteristics across consumption of legumes in the UK Biobank cohort across legume consumption strata (N = 124,194)

| Characteristic                       | All participants<br>N = 124,194 | Legume consumption strata   |                          |                             |                           |
|--------------------------------------|---------------------------------|-----------------------------|--------------------------|-----------------------------|---------------------------|
|                                      |                                 | Non-consumers<br>N = 73,711 | Low intake<br>N = 15,571 | Medium intake<br>N = 18,055 | High intake<br>N = 16,857 |
| <b>Legume intake, g/week</b>         | 0 (0, 473)                      | 0 (0, 0)                    | 81.7 (40.8, 145.8)       | 245 (163.3, 315)            | 590.6 (419.1, 1,540)      |
| <b>NAFLD<sup>a</sup></b>             | 1,201 (1.0%)                    | 736 (1.0%)                  | 146 (0.9%)               | 160 (0.9%)                  | 159 (0.9%)                |
| <b>Age</b>                           | 57.0 (44.0, 66.0)               | 58.0 (45.0, 66.0)           | 57.0 (44.0, 66.0)        | 57.0 (44.0, 66.0)           | 56.0 (44.0, 66.0)         |
| <b>Sex</b>                           |                                 |                             |                          |                             |                           |
| Female                               | 69,273 (56%)                    | 41,178 (56%)                | 9,061 (58%)              | 9,601 (53%)                 | 9,433 (56%)               |
| Male                                 | 54,921 (44%)                    | 32,533 (44%)                | 6,510 (42%)              | 8,454 (47%)                 | 7,424 (44%)               |
| <b>Yearly income, £</b>              |                                 |                             |                          |                             |                           |
| >100,000                             | 8,904 (7.2%)                    | 5,325 (7.2%)                | 1,371 (8.8%)             | 1,269 (7.0%)                | 939 (5.6%)                |
| 52,000-100,000                       | 28,831 (23%)                    | 17,048 (23%)                | 3,899 (25%)              | 4,269 (24%)                 | 3,615 (21%)               |
| 31,000-51,999                        | 32,819 (26%)                    | 19,419 (26%)                | 4,085 (26%)              | 4,756 (26%)                 | 4,559 (27%)               |
| 18,000-30,999                        | 26,854 (22%)                    | 15,983 (22%)                | 3,146 (20%)              | 3,984 (22%)                 | 3,741 (22%)               |
| <18,000                              | 15,602 (13%)                    | 9,134 (12%)                 | 1,749 (11%)              | 2,245 (12%)                 | 2,474 (15%)               |
| Unknown                              | 11,184 (9%)                     | 6802 (9.3%)                 | 1321 (8.4%)              | 1532 (8.4%)                 | 1529 (9.1%)               |
| <b>Educational level<sup>b</sup></b> |                                 |                             |                          |                             |                           |
| High                                 | 58,435 (47%)                    | 33,499 (45%)                | 8,285 (53%)              | 8,790 (49%)                 | 7,861 (47%)               |
| Intermediate                         | 41,127 (33%)                    | 25,250 (34%)                | 4,636 (30%)              | 5,735 (32%)                 | 5,506 (33%)               |
| Low                                  | 24,632 (20%)                    | 14,962 (20%)                | 2,650 (17%)              | 3,530 (20%)                 | 3,490 (21%)               |
| <b>Deprivation score<sup>c</sup></b> | -2.4 (-4.6, 2.6)                | -2.5 (-4.7, 2.4)            | -2.3 (-4.6, 2.7)         | -2.3 (-4.6, 2.8)            | -2.1 (-4.6, 3.0)          |
| <b>cohabitation</b>                  |                                 |                             |                          |                             |                           |
| Alone                                | 22,134 (18%)                    | 12,920 (18%)                | 2,692 (17%)              | 3,198 (18%)                 | 3,324 (20%)               |
| With spouse/partner                  | 92,515 (75%)                    | 55,185 (75%)                | 11,698 (75%)             | 13,491 (75%)                | 12,141 (72%)              |
| Other non-partner                    | 9,366 (7.5%)                    | 5,516 (7.5%)                | 1,153 (7.4%)             | 1,343 (7.4%)                | 1,354 (8.0%)              |
| Unknown                              | 179 (0.1%)                      | 90 (0.1%)                   | 28 (0.2%)                | 23 (0.1%)                   | 38 (0.2%)                 |
| <b>Ethnicity</b>                     |                                 |                             |                          |                             |                           |
| White                                | 119,968 (97%)                   | 71,771 (97%)                | 14,879 (96%)             | 17,280 (96%)                | 16,038 (95%)              |
| Other                                | 4,226 (3.4%)                    | 1,940 (2.6%)                | 692 (4.4%)               | 775 (4.3%)                  | 819 (4.9%)                |

|                                                       |                    |                    |                    |                    |                    |
|-------------------------------------------------------|--------------------|--------------------|--------------------|--------------------|--------------------|
| <b>Physical activity<sup>d</sup></b>                  |                    |                    |                    |                    |                    |
| High                                                  | 21,596 (17%)       | 12,408 (17%)       | 2,685 (17%)        | 3,216 (18%)        | 3,287 (19%)        |
| Moderate                                              | 55,037 (44%)       | 32,174 (44%)       | 7,102 (46%)        | 8,163 (45%)        | 7,598 (45%)        |
| Low                                                   | 30,167 (24%)       | 18,460 (25%)       | 3,735 (24%)        | 4,271 (24%)        | 3,701 (22%)        |
| Unknown                                               | 17,394 (14%)       | 10,669 (14%)       | 2,049 (13%)        | 2,405 (13%)        | 2,271 (13%)        |
| <b>Smoking status</b>                                 |                    |                    |                    |                    |                    |
| Current, >15 cigarettes/day                           | 1,797 (1.4%)       | 1,173 (1.6%)       | 189 (1.2%)         | 239 (1.3%)         | 196 (1.2%)         |
| Current, <15 cigarettes/day                           | 3,379 (2.7%)       | 2,076 (2.8%)       | 397 (2.5%)         | 481 (2.7%)         | 425 (2.5%)         |
| Former                                                | 44,379 (36%)       | 25,939 (35%)       | 5,617 (36%)        | 6,617 (37%)        | 6,206 (37%)        |
| Never                                                 | 70,978 (57%)       | 42,400 (58%)       | 8,918 (57%)        | 10,158 (56%)       | 9,502 (56%)        |
| Unknown                                               | 3,661 (2.9%)       | 2,123 (2.9%)       | 450 (2.9%)         | 560 (3.1%)         | 528 (3.1%)         |
| <b>Alcohol consumption, g/day</b>                     | 11.4 (0.0, 44.0)   | 11.8 (0.0, 44.9)   | 12.6 (0.0, 44.4)   | 11.3 (0.0, 44.1)   | 8.5 (0.0, 39.5)    |
| <b>BMI ≥ 30 kg/m<sup>2</sup></b>                      | 24,556 (20%)       | 14,871 (20%)       | 2,894 (19%)        | 3,577 (20%)        | 3,214 (19%)        |
| <b>History of NAFLD-related diseases<sup>e</sup></b>  | 45,747 (37%)       | 27,390 (37%)       | 5,713 (37%)        | 6,521 (36%)        | 6,123 (36%)        |
| <b>Family history of related diseases<sup>f</sup></b> | 96,936 (78%)       | 57,428 (78%)       | 12,127 (78%)       | 14,084 (78%)       | 13,297 (79%)       |
| <b>Weekly food group intakes, g/week<sup>g</sup></b>  |                    |                    |                    |                    |                    |
| Red and processed meat                                | 371 (0, 844)       | 396 (0, 847)       | 373 (0, 840)       | 368 (0, 866)       | 280 (0, 840)       |
| Poultry                                               | 175 (0, 607)       | 228 (0, 607)       | 182 (0, 607)       | 152 (0, 607)       | 0 (0, 607)         |
| Fish                                                  | 175 (0, 595)       | 175 (0, 607)       | 175 (0, 560)       | 175 (0, 578)       | 127 (0, 621)       |
| Refined cereals                                       | 851 (257, 1,675)   | 849 (255, 1,677)   | 873 (288, 1,647)   | 869 (273, 1,677)   | 816 (238, 1,686)   |
| Whole grain cereals                                   | 475 (0, 1,425)     | 431 (0, 1,384)     | 490 (0, 1,410)     | 518 (0, 1,468)     | 588 (0, 1,617)     |
| Mixed dishes                                          | 210 (0, 1,167)     | 175 (0, 1,143)     | 329 (0, 1,177)     | 263 (0, 1,208)     | 303 (0, 1,342)     |
| Dairy                                                 | 1,943 (718, 3,456) | 1,986 (840, 3,483) | 1,948 (783, 3,404) | 1,993 (759, 3,505) | 1,604 (292, 3,290) |
| Fats                                                  | 80 (8, 181)        | 81 (8, 182)        | 75 (8, 172)        | 81 (8, 183)        | 77 (6, 182)        |
| Fruits                                                | 1,341 (280, 2,905) | 1,292 (245, 2,814) | 1,365 (350, 2,901) | 1,386 (327, 2,996) | 1,512 (350, 3,210) |
| Nuts                                                  | 7 (0, 151)         | 0 (0, 140)         | 13 (0, 154)        | 11 (0, 164)        | 11 (0, 191)        |
| Vegetables                                            | 1,190 (331, 2,571) | 1,127 (298, 2,423) | 1,244 (451, 2,538) | 1,271 (403, 2,753) | 1,349 (379, 3,049) |

|                                |                         |                         |                         |                         |                         |
|--------------------------------|-------------------------|-------------------------|-------------------------|-------------------------|-------------------------|
| Potatoes                       | 626 (0, 1,260)          | 630 (0, 1,260)          | 613 (0, 1,248)          | 624 (0, 1,260)          | 630 (0, 1,324)          |
| Eggs and egg dishes            | 0 (0, 420)              | 0 (0, 420)              | 70 (0, 420)             | 88 (0, 438)             | 70 (0, 513)             |
| Non-alcoholic beverages        | 10,733 (7,158, 15,295)  | 10,605 (7,070, 15,155)  | 10,798 (7,271, 15,260)  | 10,815 (7,280, 15,49)   | 11,078 (7,350, 15,820)  |
| Alcoholic beverages            | 938 (0, 4,676)          | 987 (0, 4,760)          | 1,050 (0, 4,718)        | 940 (0, 4,782.4)        | 613 (0, 4,237)          |
| Snacks and sweets              | 518 (112, 1,195)        | 527 (116, 1,212)        | 495 (117, 1,120)        | 512 (117, 1,180)        | 495 (98, 1,204)         |
| Sauces and condiments          | 117 (0, 385)            | 117 (0, 385)            | 128 (0, 385)            | 117 (0, 373)            | 105 (0, 390)            |
| Total weight of consumed foods | 22,023 (16,611, 28,879) | 21,689 (16,331, 28,384) | 22,134 (16,764, 28,633) | 22,453 (17,067, 29,534) | 22,993 (17,386, 30,367) |

Continuous variables are presented as median (10%, 90%) and categorical values as number of participants (%). <sup>a</sup>NAFLD, non-alcoholic fatty liver disease. <sup>b</sup>Educational level was defined as low (Certificate of Secondary Education (CSE), National Vocational Qualifications, Higher National Diploma, Higher National Certificates, other professional qualifications, or equivalent), intermediate (A levels, O levels, General Certificate of Secondary Education, or equivalent), and high (College or University degree). <sup>c</sup>Deprivation was assessed with the Townsend Deprivation Index based on four indicators of material deprivation: non-home ownership, non-car ownership, unemployment, and overcrowding. Positive values indicate that individuals live in areas with high material deprivation and negative values indicate relative affluence.<sup>(30)</sup>

<sup>d</sup>Physical activity was based on total metabolic equivalent task (MET) minutes per week for all activity including walking, moderate, and vigorous activity, and defined as low (0-9.9 METs/week), moderate (10-49.9 METs/week), high ( $\geq 50$  METs/week), and unknown. <sup>e</sup>History of NAFLD-related diseases was defined as participant's previous diagnosis of diabetes, alcoholic liver disease, angina pectoris, hypertension, myocardial infarction, stroke, elevated cholesterol, gallbladder disease, or cancer, <sup>f</sup>Family history of related diseases was defined as diagnosis of diabetes, heart disease, stroke, hypertension, or elevated cholesterol among the mother, father, and/or biological sibling(s) of the participant. <sup>g</sup>The definition and inclusion of foods in each food group can be found in Supplementary Table 1.

Table 2. Hazard ratios and 95 % confidence intervals for non-alcoholic fatty liver disease in the UK Biobank when consuming 80 g/week of legumes in specific and non-specific substitutions, and without food substitution.

| Statistical model                                               | Consuming 80 g/week of legumes instead of 80 g/week of |                      |                   |
|-----------------------------------------------------------------|--------------------------------------------------------|----------------------|-------------------|
|                                                                 | Red and processed meat <sup>a</sup>                    | Poultry <sup>b</sup> | Fish <sup>c</sup> |
| Full sample<br>(N = 124,194, events = 1201)                     |                                                        |                      |                   |
| Model 1                                                         | 0.96 (0.94; 0.97)                                      | 0.97 (0.95; 0.99)    | 0.99 (0.97; 1.01) |
| Model 2                                                         | 0.96 (0.94; 0.98)                                      | 0.97 (0.95; 0.99)    | 0.98 (0.96; 1.01) |
| Model 3                                                         | 0.97 (0.95; 0.99)                                      | 0.98 (0.96; 1.00)    | 0.99 (0.97; 1.01) |
| Consumers of legumes <sup>d</sup><br>(N = 50,483, events = 465) |                                                        |                      |                   |
| Model 2                                                         | 0.97 (0.94; 0.99)                                      | 0.98 (0.95; 1.02)    | 0.99 (0.95; 1.02) |

Model 1 was adjusted for age at recruitment, geographical region of recruitment, sex, g/week intake of all other dietary components (red and processed meat, poultry, fish, refined cereal, whole grain cereal, fruits, vegetables, potatoes, nuts, dairy, fats, eggs and egg-dishes, mixed dishes, snacks and sweets, sauce and condiments, non-alcoholic beverages, and alcoholic beverages) apart from the food to be substituted, and total intake of all dietary components in g/week. Model 2 was further adjusted for alcohol intake (ethanol g/week), ethnicity, Townsend Deprivation Index, educational level, yearly income, cohabitation, physical activity, smoking status, history of NAFLD-related diseases, family history of NAFLD-related diseases, and cancer. Model 3 was further adjusted for BMI  $\geq 30$  kg/m<sup>2</sup>. <sup>a</sup>Red and processed meat included beef, pork, lamb, and other meats including offal, and sausages, bacon, ham, and liver pâté. <sup>b</sup>Poultry included poultry with or without skin and fried poultry with batter or breadcrumbs. <sup>c</sup>Fish included oily fish, white fish, tinned tuna, fried fish with batter or breadcrumbs, and shellfish. <sup>d</sup>Study sample after excluding participants who reported no consumption of legumes at either of the completed dietary assessments.

Table 3. Hazard ratio and 95% confidence intervals for NAFLD when substituting 80 g/week of meat, poultry, or fish with 80 g/week of legumes across altered exposure level and exclusion criteria.

| Altered exposure level                                                                               | Hazard ratios and 95 % confidence intervals |                      |                   |
|------------------------------------------------------------------------------------------------------|---------------------------------------------|----------------------|-------------------|
|                                                                                                      | Red and processed meat <sup>a</sup>         | Poultry <sup>b</sup> | Fish <sup>c</sup> |
| Replacing 80 g/week of legumes, including peas, for animal-based foods, N=124,194 (events = 1201)    | 0.95 (0.92; 0.99)                           | 0.97 (0.93; 1.01)    | 0.98 (0.94; 1.02) |
| Replacing 80 g/week of legumes, excluding soymilk, for animal-based foods, N=124,194 (events = 1201) | 0.96 (0.93; 0.98)                           | 0.97 (0.95; 1.00)    | 0.98 (0.96; 1.01) |
| Altered exclusion criteria                                                                           |                                             |                      |                   |
| Individuals with alcohol intake below 90 <sup>th</sup> percentile, N=111,774 (events = 1043)         | 0.95 (0.94; 0.97)                           | 0.97 (0.95; 0.99)    | 0.98 (0.96; 1.00) |
| Individuals with normal alanine aminotransferase level <sup>d</sup> , N = 108,754 (events = 823)     | 0.96 (0.94; 0.98)                           | 0.98 (0.95; 1.00)    | 0.98 (0.96; 1.01) |
| Individuals with $\geq 3$ 24-hour assessments <sup>e</sup> , N = 76,440 (events = 696)               | 0.96 (0.93; 0.98)                           | 0.98 (0.95; 1.01)    | 0.98 (0.95; 1.01) |

Adjustment followed the main analyses Model 2 and adjusted for age at recruitment, geographical region of recruitment, sex, g/week intake of all other dietary components (meat, poultry, fish, refined cereal, whole grain cereal, fruits, vegetables, potatoes, nuts, dairy, fats, eggs and egg-dishes, mixed dishes, snacks and sweets, sauce and condiments, non-alcoholic beverages, and alcoholic beverages) apart from the food to be substituted, total intake of all dietary components in g/week, alcohol intake (ethanol g/week), ethnicity, Townsend Deprivation Index, educational level, yearly income, cohabitation, physical activity, smoking status, history of NAFLD-related diseases, family history of NAFLD-related diseases, and cancer. <sup>a</sup>Red and processed meat included beef, pork, lamb, and other meats including offal, and sausages, bacon, ham, and liver pâté. <sup>b</sup>Poultry included poultry with or without skin and fried poultry with batter or breadcrumbs. <sup>c</sup>Fish included oily fish, white fish, tinned tuna, fried fish with batter or breadcrumbs, and shellfish. <sup>d</sup>Analyses including individuals with alanine aminotransferase levels below 40 U/L. <sup>e</sup>Analyses restricted to individuals with three or more completed 24-hour dietary assessments.

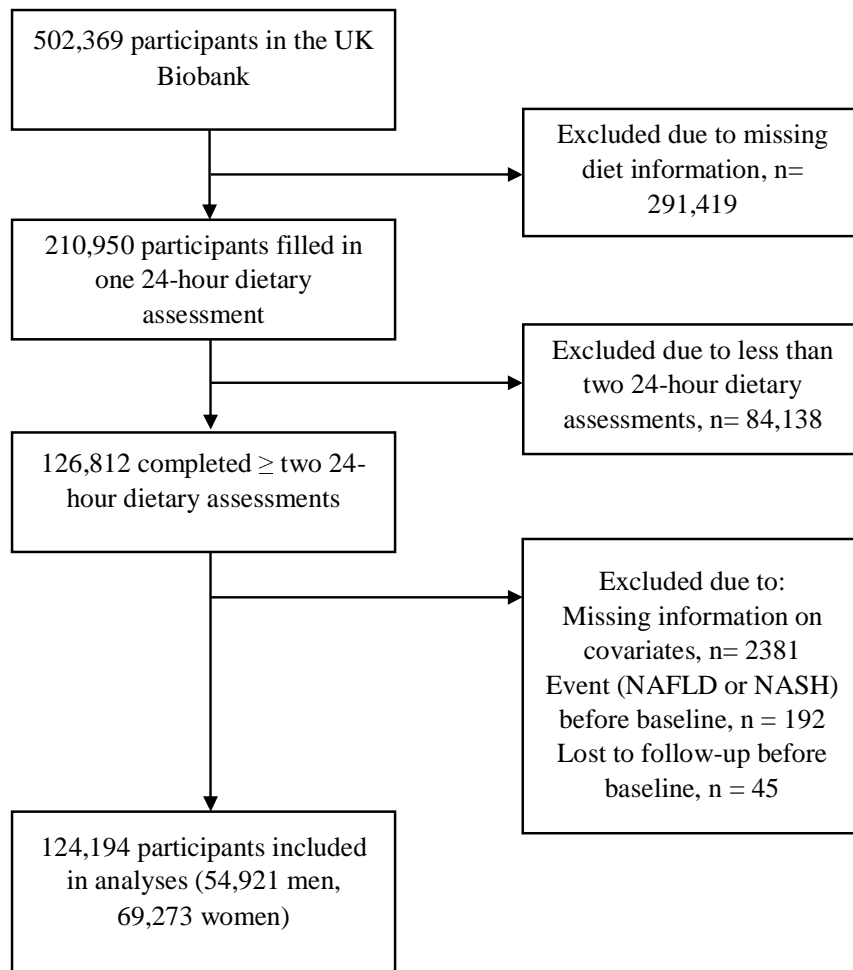

Figure 1. Flowchart of participants in the UK Biobank eligible for inclusion
